# Supplementary material for: Understanding the contribution of hydroxyl to the energy band of a semiconductor: Bi2O(OH)2SO4vs. Bi6S2O15
Source: Royal Society of Chemistry journal article supplement (doi:10.1039/c5dt04797h), 2016-01-01
Supplement: c5dt04797h1.pdf [file c5dt04797h1.pdf]

Supporting information for

**Understanding the contribution of hydroxyl to energy band  
of semiconductor:  $\text{Bi}_2\text{O}(\text{OH})_2\text{SO}_4$  vs.  $\text{Bi}_6\text{S}_2\text{O}_{15}$**

Juan Xu<sup>1</sup>, Fei Teng<sup>1\*</sup>, Yunxuan Zhao<sup>1</sup>, Yandong Kan<sup>1</sup>, Liming Yang<sup>1</sup>, Yang Yang<sup>1</sup>,  
Wenqing Yao<sup>2</sup>, Yongfa, Zhu<sup>2</sup>

*<sup>1</sup>Jiangsu Engineering and Technology Research Center of Environmental Cleaning Materials (ECM), Jiangsu Key Laboratory of Atmospheric Environment Monitoring and Pollution Control (AEMPC), Jiangsu Joint Laboratory of Atmospheric Pollution Control (APC), Collaborative Innovation Center of Atmospheric Environment and Equipment Technology (AEET), School of Environmental Science and Engineering, Nanjing University of Information Science & Technology, 219 Ningliu Road, Nanjing 210044, China.*

*<sup>2</sup>Department of Chemistry, Tsinghua University, Beijing 100082, China.*

---

\* Corresponding author. Tel./Fax.: +86-25-58731090; Email address: tfwd@163.com

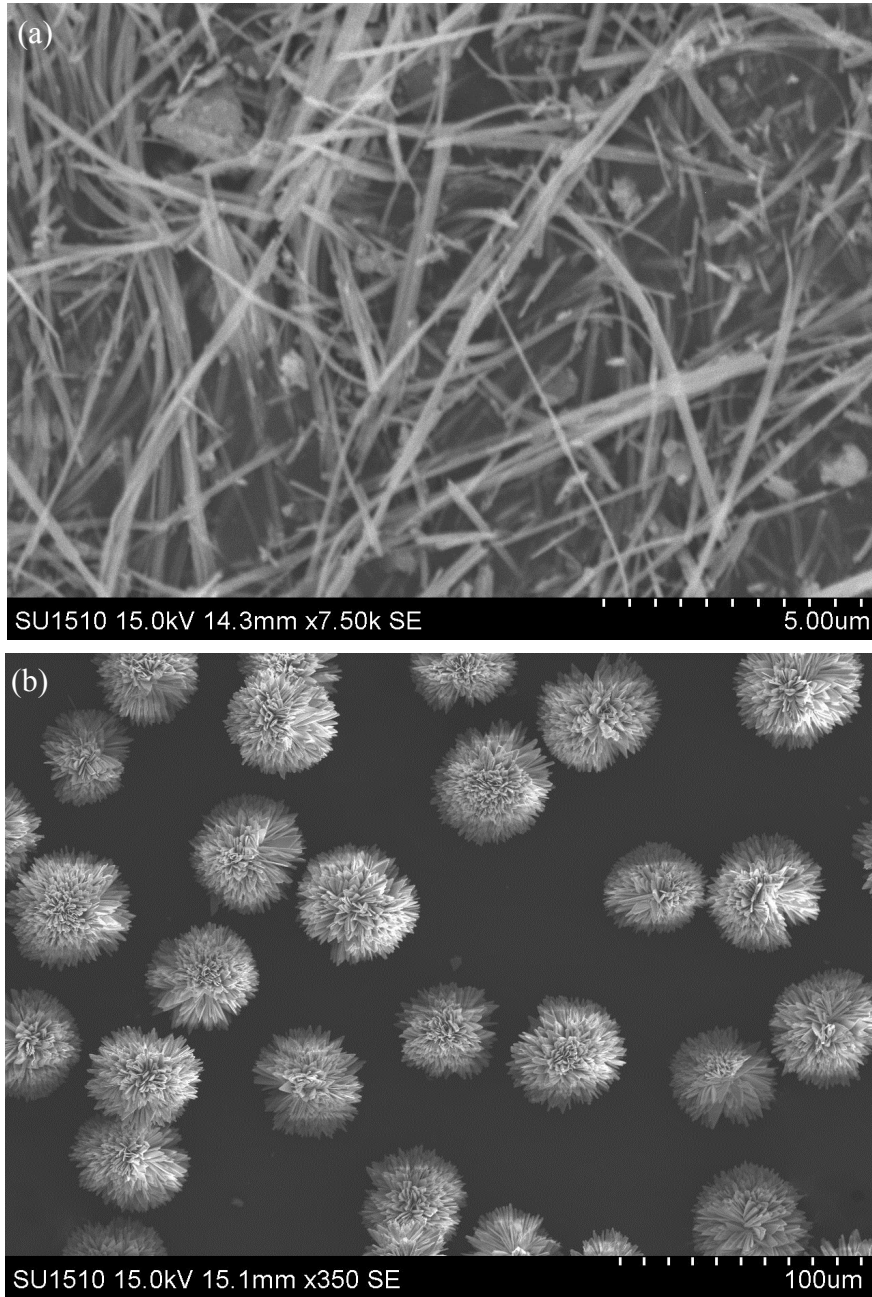

**Figure S1.** SEM images of as-prepared samples of (a)  $\text{Bi}_6\text{S}_2\text{O}_{15}$  and (b)  $\text{Bi}_2\text{O}(\text{OH})_2\text{SO}_4$ .

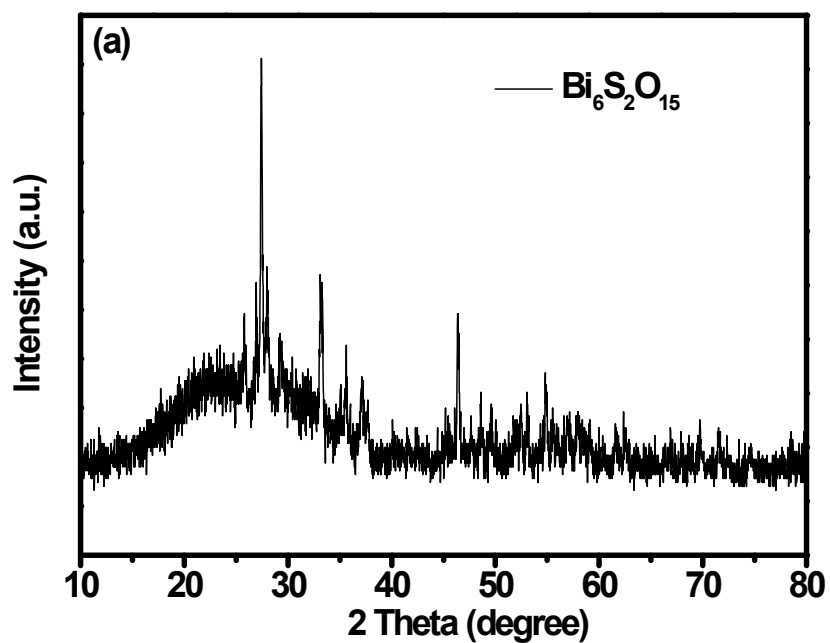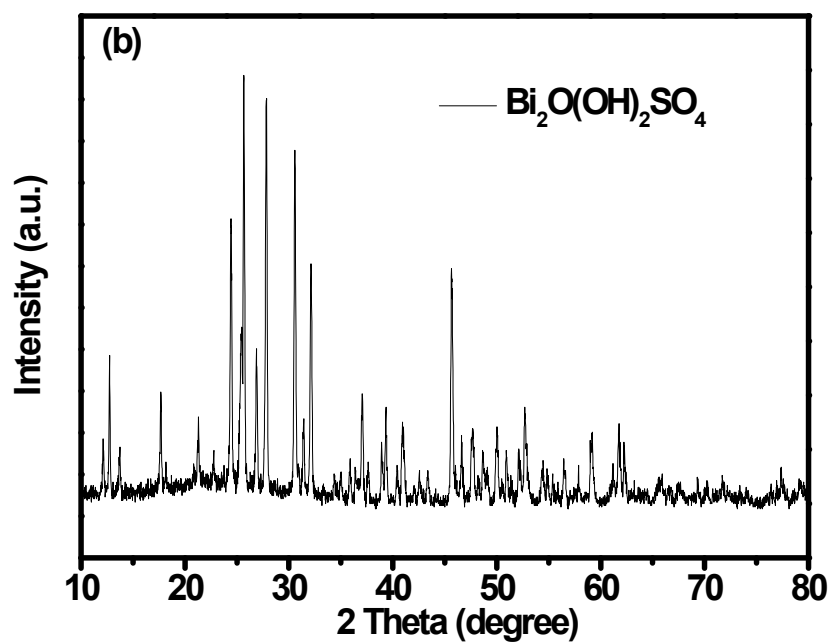

**Figure S2.** XRD pattern of as-prepared samples of (a)  $\text{Bi}_6\text{S}_2\text{O}_{15}$  and (b)  $\text{Bi}_2\text{O}(\text{OH})_2\text{SO}_4$ .
